# Supplementary material for: A self-calibrating flexible SERS substrate incorporating PB@Au assemblies for reliable and reproducible detection
Source: Royal Society of Chemistry journal article supplement (doi:10.1039/d4an00151f), 2024-01-01
Supplement: d4an00151f1.pdf [file d4an00151f1.pdf]

## Supporting Information

### **A Self-Calibrating Flexible SERS Substrate Incorporated PB@Au Assemblies for Reliable and Reproducible Detection**

Jie Zhou,<sup>a</sup> Huiting Wang,<sup>a</sup> Yaxian Chen,<sup>a</sup> Dongxue Lin,<sup>a</sup> Ling Zhang,<sup>b</sup> Zhiqiang Xing,<sup>a</sup> Qian Zhang<sup>\*a</sup> and Jiarui Xia<sup>\*c</sup>

<sup>a</sup> College of Chemistry, Liaoning University, Shenyang, 110036, China.

<sup>b</sup> College of Chemistry and Life Science, Shenyang Normal University, Shenyang 110034, China.

<sup>c</sup> Institute of Health Sciences, China Medical University, Shenyang, 110122, China.

\*Corresponding author.

E-mail: zhangq@lnu.edu.cn;

Phone and fax: 86-24-62202258;

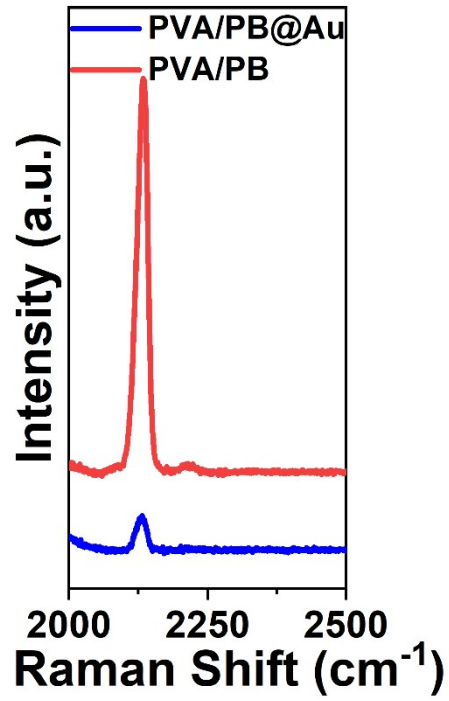

**Fig S1.** Raman spectrum of PVA/PB film and SERS spectrum of PVA/PB@Au film.

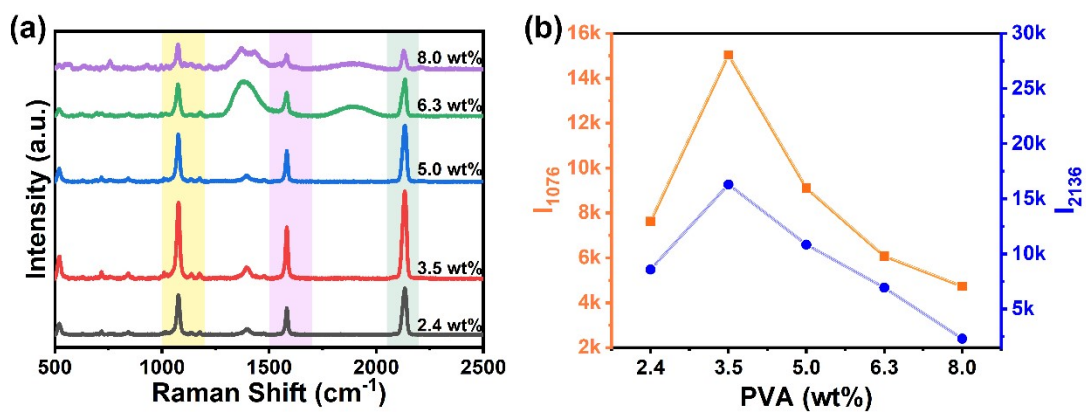

**Fig S2.** SERS spectra of  $10^{-4}$  M 4-MBA adsorbed on PVA/PB@Au films synthesized with different concentrations of PVA solutions (a).  $I_{1076}$  and  $I_{2136}$  at different concentrations of PVA solutions (b).
